# Supplementary material for: Delivering water, sanitation and hygiene interventions to women and children in conflict settings: a systematic review
Source: PubMed Central journal article supplement (PMC7348465; doi:10.1136/bmjgh-2019-002064), 2020-07-08
Supplement: bmjgh-2019-002064supp001.pdf [file bmjgh-2019-002064supp001.pdf]

## Appendix A. Search strategy for MEDLINE database

### I. Conflict related terms

#### 1. Medline

1. disasters/ or emergencies/ or mass casualty incidents/
2. disaster victims/
3. ((disaster or disasters or catastrophe or catastrophes) adj5 (environ\* or human or manmade or "man made" or nature or natural or weather)).tw,kf.
4. ("mass casualty" or "mass casualties" or "mass fatalities" or "mass fatality").tw,kf.
5. ((crisis or crises) adj5 (environ\* or human or manmade or "man made" or nature or natural or weather)).tw,kf.
6. "warfare and armed conflicts"/ or armed conflicts/ or warfare/ or biological warfare/ or bioterrorism/ or chemical warfare/ or chemical terrorism/ or nuclear warfare/ or psychological warfare/ or war crimes/ or ethnic cleansing/ or genocide/ or holocaust/ or war exposure/ or war-related injuries/
7. afghan campaign 2001-/ or gulf war/ or iraq war, 2003-2011/
8. ("afghan campaign" or "armed conflict" or "armed conflicts" or "gulf war" or "iraq war" or "war time" or "wartime").tw,kf.
9. ((armed or zone or political or civil) adj3 (conflict or conflicts or attack or attacks or war or wars or "no fly")).tw,kf.
10. ("war related injuries" or "war related traumas" or "war related injury" or "war related trauma").tw,kf.
11. ("militant group" or "militant groups" or "militant organization" or "militant organizations" or "militant organisation" or "militant organisations").tw,kf.
12. ("biological terrorism" or bioterrorism or biowarfare or "chemical terrorism" or "ethnic cleansing" or "ethnic cleansings" or "gas poisoning" or genocide or holocaust or holocausts or "nuclear terrorism" or "war exposure" or "war exposures").tw,kf.
13. Disaster Medicine/
14. disease outbreaks/
15. Emergency Medical Services/
16. ((emergency or emergencies) adj5 (environ\* or human or manmade or "man made" or nature or natural or weather)).tw,kf.
17. Starvation/
18. (famine or famines or starvation or starvations).tw,kf.
19. cyclonic storms/ or droughts/ or floods/ or tornadoes/ or tidal waves/
20. avalanches/ or earthquakes/ or landslides/ or tidal waves/ or tsunamis/ or volcanic eruptions/
21. (avalanche or avalanches or cyclone or cyclones or drought or droughts or earthquake or earthquakes or flood or flooded or flooding or floods or hurricane or hurricanes or landslide or landslides or "land slide" or "land slides" or mudslide or mudslides or "mud slide" or "mud slides" or storm or storms or tornado or tornadoes or tsunami or tsunamis or typhoon or typhoons or "volcanic ash" or "volcanic eruption" or "volcanic eruptions" or "volcanic gases").tw,kf.
22. refugees/
23. (evacuee or evacuees or refugee or refugees or squatter or squatters or transients).tw,kf.
24. relief work/ or rescue work/
25. ((rescue or relief or aid) adj (plan or plans or activity or activities or agency or agencies)).tw,kf.
26. ("aid plan" or "aid work" or "relief plan" or "relief work" or "rescue plan" or "rescue work").tw,kf.
27. ((staff or staffs or worker or workers) adj3 (relief or aid)).tw,kf.
28. (humanitarian assistance or humanitarian assistances or relief work or relief works).tw,kf.

29. (humanitarian adj2 (aid or response or relief or crisis or crises or emergency or emergencies or disaster or disasters)).tw,kf.
30. Altruism/
31. (humanitarianism or altruism).tw,kf.
32. ("displaced children" or "displaced families" or "displaced family" or "displaced individuals" or "displaced internally" or "displaced men" or "displaced people" or "displaced peoples" or "displaced person" or "displaced persons" or "displaced population" or "displaced populations" or "displaced women" or "forced displacement" or "forced displacements" or "internal displaced" or "internal displacement" or "internally displaced" or "population displaced" or "population displacement").tw,kf.
33. (((camp or camps) and displac\*) or "protected village\*").tw,kf.
34. (victim or victims).tw,kf.
35. rubble.tw,kf.
36. or/1-35

## II. Population of interest

### 1. MEDLINE

37. adolescent/ or young adult/
38. (adolescence or adolescent or adolescents or teen\* or youth or youths or "young adult" or "young adults").tw,kf.
39. Pregnant Women/
40. exp pregnancy/
41. (expectant or expectancy or gravid\* or pregnant or pregnancies or pregnancy).tw,kf.
42. ("mother to be" or "mothers to be").tw,kf.
43. (prenatal or "pre natal").mp.
44. (perinatal or "peri natal").mp.
45. ((trimester or trimesters) adj3 (first or second or mid or third or final or "1st" or "2nd" or "3rd")).tw,kf.
46. (midtrimester or midtrimesters or "early placental phase" or "early placental phases").tw,kf.
47. exp Delivery, Obstetric/
48. ((labor or labour) adj5 (birth\* or breech or childbirth or childbirths or complicat\* or difficult or early or easy or induce\* or induction or late or obstetric\* or onset or pregnan\* or present\*)).tw,kf.
49. parturients.tw,kf.
50. (birth or births or childbirth or childbirths or parturition or parturitions).tw,kf.
51. ("abdominal deliveries" or "abdominal delivery" or "c-section" or "c-sections" or caesarean or caesareans or cesarean or cesareans or "postcesarean section" or "postcaesarean section").tw,kf.

52. exp Abortion, Induced/
53. (abortion or abortions or embryotomies or embryotomy or "postconception fertility control").tw,kf.
54. ((pregnancy or pregnancies) adj3 terminat\*).tw,kf.
55. "sexually active".tw,kf.
56. child/ or child, preschool/ or infant/ or infant, newborn/ or infant, low birth weight/ or infant, small for gestational age/ or infant, very low birth weight/ or infant, extremely low birth weight/ or infant, postmature/ or infant, premature/ or infant, extremely premature/
57. (infan\* or newborn\* or "new born\*" or neonat\* or baby\* or babies or toddler\* or boy or boys or boyfriend or boyhood or girl\* or kid or kids or child\* or pediatric\* or paediatric\* or peadiatric\* or prematur\* or preterm\*).mp. or school\*.tw.
58. refugees/
59. (refugee or refugees).tw,kf.
60. or/37-59
61. 36 and 60

### III. Domain specific terms – [WASH](#)

#### 1. MEDLINE

62. Hygiene/ or Hand Hygiene/ or Disinfection/ or Hand Disinfection/ or Sanitation/ or Sanitary Engineering/ or Toilet Facilities/ or Waste Disposal, Fluid/
63. (hygiene or hygienic or "hand sanitisation" or "hand sanitization" or "hand washing" or handwashing or disinfect or disinfected or disinfection or detergent or soap or soaps or sanitary or sanitation or "public facilities" or latrine or latrines or "septic tank" or "septic tanks" or toilet or toilets or "non food item" or "non food items" or "core relief item" or "core relief items").tw,kf.
64. Feces/
65. (faeces or feces or "faecal excretion\*" or "fecal excretion\*" or defecat\* or defaecat\* or stool or stools or "faecal matter" or "faecal matters" or "fecal matter" or "fecal matters" or "fecal oral" or "faecal oral").tw,kf.
66. Waste Water/ or Sewage/
67. ("waste water" or "waste waters" or wastewater or wastewaters or sewage or sludge or sewerage or "human excreta disposal" or "excreta management").tw,kf.
68. Refuse Disposal/
69. ("garbage collection\*" or "garbage disposal\*" or "refuse collection\*" or "refuse disposal\*" or "trash collection\*" or "waste disposal\*" or "waste treatment\*").tw,kf.

70. Drinking Water/

71. ("clean water" or drinkwater or "drink\* water" or "piped water" or "potable water" or "fresh water" or "private water" or "public water").tw,kf.

72. Water Supply/

73. ("water supply" or "water supplies" or "water source" or "water sources" or "water provision\*" or "rain water" or rainwater).tw,kf.

74. Ground Water/

75. (aquifer or aquifers or "bore well\*" or borewell\* or "ground water\*" or groundwater\* or "water table" or "well water\*" or wellwater\*).tw,kf.

76. Water Pollution/ or Water Quality/

77. ("water quality" or "water pollut\*").tw,kf.

78. watsan.tw,kf.

79. "point of use".tw,kf.

80. or/62-79

81. 61 and 80

82. limit 81 to dc=20170530-20180331

83. ("2017 05 30\*" or "2017 05 31\*" or "2017 06\*" or "2017 07\*" or "2017 08\*" or "2017 09\*" or "2017 10\*" or "2017 11\*" or "2017 12\*" or "2018 01\*" or "2018 02\*" or "2018 03\*").dt.

84. 81 and 83

85. 82 or 84

~~~ End of Appendix ~~~

## Appendix B. Characteristics of indexed publications

| Author, Pub Year | Report Type  | Country                                         | Target Population | Displacement status | Setting | Interventions                                                             | Intervention start-year | Delivery Platform                  | Delivery Approach      | Delivery Site                  | Delivery Personnel         |
|------------------|--------------|-------------------------------------------------|-------------------|---------------------|---------|---------------------------------------------------------------------------|-------------------------|------------------------------------|------------------------|--------------------------------|----------------------------|
| Ahoua, 2006      | Obs. study   | Congo (Democratic Republic of)                  | All ages          | IDPs                | Camp    | Latrine provision, Provision of clean water                               | 2005                    | NGO/UN agencies                    | NR                     | Community/markets              | NGO/ UN Agency Staff       |
| Altmann, 2017    | Non-research | Yemen                                           | All ages          | NR                  | NR      | Hygiene promotion, Provision of clean water, Source-based water treatment | 2016                    | NGO/UN agencies, Healthcare system | Centre-based, Outreach | Water distribution point, Home | CHWs, NGO/ UN Agency Staff |
| WHO, 1994        | Non-research | Rwanda, Tanzania, Congo(Democratic Republic of) | All ages          | IDPs, Refugees      | Camp    | Provision of clean water                                                  | 1994                    | NGO/UN agencies                    | NR                     | NR                             | NR                         |
| Benjamin, 1996   | Non-research | Tanzania                                        | All ages          | Refugees            | Camp    | Latrine provision                                                         | 1994                    | NGO/UN agencies                    | Outreach               | Community/markets              | NR                         |

|             |              |                  |          |                     |                 |                                                                                                                                        |      |                                    |                        |                                                                                 |                               |
|-------------|--------------|------------------|----------|---------------------|-----------------|----------------------------------------------------------------------------------------------------------------------------------------|------|------------------------------------|------------------------|---------------------------------------------------------------------------------|-------------------------------|
| Benny, 2014 | Obs. study   | Papua New Guinea | All ages | IDPs, Not displaced | Camp            | Ban on the sale of cooked food and ice blocks, Hygiene practice compliance inspections (township shops and markets), Latrine provision | 2013 | Healthcare system                  | Centre-based           | Clinics, Community/markets                                                      | Health workers, Civic leaders |
| Bile, 2011  | Non-research | Pakistan         | All ages | IDPs                | Camp, Dispersed | Hygiene promotion, Latrine provision, Provision of clean water, Source-based water treatment                                           | NR   | NGO/UN agencies, Healthcare system | Centre-based, Outreach | First level care facilities, Community/markets, Camps - not otherwise specified | CHWs, NGO /UN Agency staff    |
| Brown, 1997 | Non-research | Rwanda           | All ages | Returning refugees  | Rural           | Latrine provision, Provision of clean water                                                                                            | 1996 | NGO/UN agencies, Healthcare system | Centre-based, Outreach | Clinic, Mobile clinics, Health posts                                            | NR                            |
| Chan, 2018  | Non-research | Bangladesh       | All ages | Refugees            | Camp, Dispersed | Provision of clean water                                                                                                               | 2017 | NGO/UN agencies                    | Centre-based           | Water distribution point                                                        | NR                            |
| Doocy, 2006 | RCT          | Liberia          | All ages | IDPs                | Camp            | Household water treatment                                                                                                              | 2004 | NGO/UN agencies                    | NR                     | Home                                                                            | NGO/ UN Agency staff          |

|                 |               |              |          |                          |                 |                                                                              |      |                                    |                        |                                                                                   |                                      |
|-----------------|---------------|--------------|----------|--------------------------|-----------------|------------------------------------------------------------------------------|------|------------------------------------|------------------------|-----------------------------------------------------------------------------------|--------------------------------------|
| Eltom, 2001     | Non-research  | Afghanistan  | All ages | IDPs, Returning refugees | Camp            | Latrine provision, Soap/hygiene kit distribution                             | 2001 | NGO/UN agencies                    | NR                     | Community/markets                                                                 | NGO/ UN Agency staff, CHWs           |
| Guerin, 2004    | Obs. study    | Sierra Leone | All ages | NR                       | NR              | Hygiene promotion                                                            | 1999 | NGO/UN agencies                    | Centre-based, Outreach | Clinics, Community/markets                                                        | Health workers                       |
| Hatch, 1994     | Obs. study    | Malawi       | All ages | Refugees                 | Camp, Dispersed | Hygiene promotion, Source-based water treatment                              | 1988 | NGO/UN agencies, Healthcare system | Outreach               | Hospital                                                                          | Health workers                       |
| Husain, 2015    | Mixed methods | Ethiopia     | All ages | Refugees                 | Camp            | Hygiene promotion, Soap/hygiene kit distribution                             | 2012 | NGO/UN agencies                    | Outreach               | Home                                                                              | Health workers                       |
| Iijima, 1994    | Obs. study    | Kenya        | All ages | Hosts, Refugees          | NR              | Hygiene promotion                                                            | 1994 | NGO/UN agencies                    | NR                     | NR                                                                                | NR                                   |
| Kajeewiwa, 2016 | Ob. study     | Thailand     | All ages | Refugees                 | Dispersed       | Provision of clean water                                                     | 2013 | NGO/UN agencies, Research          | Centre-based           | Community/market                                                                  | NGO/ UN Agency staff, Researchers    |
| Kur, 2009       | Obs. study    | South Sudan  | All ages | IDPs, Refugees           | Camp, Dispersed | Hygiene promotion, Latrine provision, Provision of clean water, Source-based | 2007 | NGO/UN agencies, Healthcare system | Centre-based, Outreach | Community/market, Home, Camps - not otherwise specified, Water distribution point | NGO/ UN Agency Staff, Health workers |

|                |              |                                |          |          |      |                                                                                                                                                 |      |                                    |                        |                          |                      |
|----------------|--------------|--------------------------------|----------|----------|------|-------------------------------------------------------------------------------------------------------------------------------------------------|------|------------------------------------|------------------------|--------------------------|----------------------|
|                |              |                                |          |          |      | water treatment                                                                                                                                 |      |                                    |                        |                          |                      |
| Mahamud, 2012  | Obs. study   | Kenya                          | All ages | Refugees | Camp | Household water treatment, Hygiene promotion, Latrine provision, Provision of clean water Screening for referral, Soap/hygiene kit distribution | 2009 | NGO/UN agencies                    | Outreach               | Community/markets        | CHWs                 |
| Matthys, 1998  | Non-research | Congo (Democratic Republic of) | All ages | Refugees | Camp | Latrine provision, Source-based water treatment                                                                                                 | 1997 | NGO/UN agencies                    | Centre-based           | NR                       | NR                   |
| Milton, 2017   | Non-research | Bangladesh                     | All ages | Refugees | Camp | Provision of clean water                                                                                                                        | NR   | NGO/UN agencies, Healthcare system | Centre-based           | Water distribution point | NR                   |
| Nahimana, 2017 | Obs. study   | Rwanda                         | All ages | Refugees | Camp | Hygiene promotion, Latrine provision, Source-based water treatment                                                                              | 2016 | NGO/UN agencies, Healthcare system | Centre-based, Outreach | Community/markets, Home  | Health workers, CHWs |



|                |                   |                 |                                                              |          |      |                                                        |      |                 |              |      |                                   |
|----------------|-------------------|-----------------|--------------------------------------------------------------|----------|------|--------------------------------------------------------|------|-----------------|--------------|------|-----------------------------------|
| Nyoka, 2017    | Mixed methods     | Kenya           | All ages                                                     | Refugees | Camp | Latrine provision/<br>human excreta management         | 2014 | NGO/UN agencies | Outreach     | Home | NGO/ UN Agency staff              |
| Obol, 2013     | Obs. study        | Uganda          | All ages                                                     | IDPs     | Camp | Water and sanitation services                          | 2009 | NGO/UN agencies | Outreach     | NR   | NR                                |
| Peterson, 1998 | Obs. study        | Malawi          | All ages                                                     | Refugees | Camp | Soap/hygiene kit distribution                          | 1993 | NGO/UN agencies | Outreach     | NR   | NR                                |
| Plummer, 1995  | Non-research      | Tanzania        | All ages                                                     | Refugees | Camp | Hygiene promotion                                      | 1994 | NGO/UN agencies | Outreach     | NR   | CHWs, Religious Leaders, Teachers |
| Roberts, 2001  | RCT               | Malawi          | All ages                                                     | Refugees | Camp | Household water treatment                              | 1993 | NGO/UN agencies | Outreach     | Home | NGO/ UN Agency staff              |
| Rull, 2018     | Non-research      | South Sudan     | All ages                                                     | IDPs     | Camp | Provision of clean water, Source-based water treatment | 2013 | NGO/UN agencies | Centre-based | NR   | NGO/ UN Agency staff              |
| Schmitt, 2017  | Qualitative study | Burma (Myanmar) | Adolescents girls (10-19 years old), Women (20-49 years old) | IDPs     | Camp | Soap/hygiene kit distribution                          | 2015 | NGO/UN agencies | NR           | NR   | NGO/ UN Agency staff              |

|               |            |             |          |          |      |                                                                                                                                                  |      |                                    |                        |                                 |                      |
|---------------|------------|-------------|----------|----------|------|--------------------------------------------------------------------------------------------------------------------------------------------------|------|------------------------------------|------------------------|---------------------------------|----------------------|
| Shultz, 2009  | Obs. study | Kenya       | All ages | Refugees | Camp | Hygiene promotion                                                                                                                                | 2005 | NGO/UN agencies                    | NR                     | NR                              | NR                   |
| Thomson, 2013 | Obs. study | South Sudan | All ages | Refugees | Camp | Household water treatment, Hygiene Promotion, Latrine Provision, Provision of clean water, Screening for referral, Soap/hygiene kit distribution | 2012 | NGO/UN agencies, Healthcare System | Centre-based, Outreach | Clinics, Home, Community/market | CHWs                 |
| Walden, 2005  | Obs. study | Sudan       | All ages | IDPs     | Camp | Household water treatment, Hygiene promotion                                                                                                     | 2004 | NGO/UN Agencies                    | Outreach               | Water distribution point, Home  | NGO /UN Agency staff |



## Appendix D. Characteristics of grey literature publications

| Author, Pub Year | Report Type  | Country  | Target Population | Displacement status | Setting         | Interventions                               | Intervention start-year | Delivery Platform | Delivery Approach | Delivery Site     | Delivery Personnel  |
|------------------|--------------|----------|-------------------|---------------------|-----------------|---------------------------------------------|-------------------------|-------------------|-------------------|-------------------|---------------------|
| IRC, 2016        | Non-research | Ethiopia | All ages          | Refugees            | Camp            | Hygiene promotion, Latrine provision        | NR                      | NGO/UN agencies   | Outreach          | Community/market  | NGO/UN Agency staff |
| UNHCR, 2018      | Non-research | Rwanda   | All ages          | Refugees            | Camp            | Latrine provision                           | 2016                    | NGO/UN agencies   | Centre-based      | Community/market  | NGO/UN Agency staff |
| Giordano, 2017   | Non-research | Jordan   | All ages          | Refugees            | Camp, Dispersed | Cash based intervention/assistance          | 2016                    | NGO/UN agencies   | Centre-based      | Community/markets | NGO/UN Agency staff |
| Richardson, 2013 | Non-research | Ethiopia | All ages          | Refugees            | Camp            | Provision of clean water, Latrine provision | 2011                    | NGO/UN agencies   | NR                | Community/markets | NGO/UN Agency staff |

|                  |              |           |                      |                |           |                                                                           |      |                                    |                        |                                   |                                        |
|------------------|--------------|-----------|----------------------|----------------|-----------|---------------------------------------------------------------------------|------|------------------------------------|------------------------|-----------------------------------|----------------------------------------|
| Coinco, 2014     | Non-research | Sudan     | 13mo-19yrs, all ages | IDPs           | NR        | Hygiene promotion, Provision of clean water                               | 2015 | NGO/UN agencies                    | Centre-based           | Schools, Water distribution point | NGO/UN Agency staff, Community members |
| Waddah, 2016     | Non-research | Palestine | All ages             | IDPs, Refugees | Dispersed | Provision of clean water, e-voucher for hygiene products and WASH support | 2014 | NGO/UN agencies                    | Centre-based, Outreach | Home, Community/markets           | NGO/UN Agency staff                    |
| Leonardi, 2013   | Non-research | Mali      | 13mo-14yrs           | IDPs, Refugees | Dispersed | Soap/hygiene kit distribution                                             | 2012 | Healthcare system, NGO/UN agencies | Centre-based           | Clinics                           | Health workers                         |
| UNICEF, 2016 (A) | Non-research | Pakistan  | 13mo-19yrs           | IDPs, Refugees | Camp      | Latrine provision                                                         | 2011 | Education, NGO/UN agencies         | Centre-based, Outreach | Community/markets, Schools        | NGO/UN Agency staff                    |

|                  |              |         |                             |                                |                 |                                                          |      |                                                                               |                        |                                                                                                                      |                                                                      |
|------------------|--------------|---------|-----------------------------|--------------------------------|-----------------|----------------------------------------------------------|------|-------------------------------------------------------------------------------|------------------------|----------------------------------------------------------------------------------------------------------------------|----------------------------------------------------------------------|
| UNICEF, 2016 (B) | Non-research | Lebanon | Adolescents ≥10yrs          | Host, Refugees                 | NR              | Hygiene promotion, Soap/hygiene kit distribution         | 2015 | Education, Faith-based system, Healthcare system, Mass media, NGO/UN agencies | Centre-based, Outreach | Camps, Electronic/print, Health posts, Hospitals, Mobile clinics, Place of worship, Schools, Community/markets, Home | NGO/UN Agency staff, Lebanon Country Officers, Implementing partners |
| Apiyo, 2014      | Non-research | Somalia | All ages                    | Host, IDPs, Returning Refugees | Camp, Dispersed | Household water treatment, Soap/hygiene kit distribution | 2011 | NGO/UN agencies                                                               | Centre-based           | Water distribution point                                                                                             | NGO/UN Agency staff                                                  |
| UNICEF, 2016 (C) | Non-research | Somalia | Adolescents 10-19yrs, Women | IDPs, Not displaced            | Camp, Dispersed | Soap/hygiene kit distribution                            | 2011 | NGO/UN agencies                                                               | Centre-based           | Community/markets                                                                                                    | NGO/UN Agency staff                                                  |

|                     |                  |                                |                                                        |                           |                    |                                                    |      |                    |                  |                       |                        |
|---------------------|------------------|--------------------------------|--------------------------------------------------------|---------------------------|--------------------|----------------------------------------------------|------|--------------------|------------------|-----------------------|------------------------|
|                     |                  |                                | ≥20yrs,<br>PLW                                         |                           |                    |                                                    |      |                    |                  |                       |                        |
| UNICEF,<br>2016 (D) | Non-<br>research | Central<br>African<br>Republic | Children<br>13mo-<br>19yrs,<br>Women<br>≥20yrs,<br>PLW | IDPs,<br>Not<br>displaced | Camp,<br>Dispersed | Soap/hygiene kit<br>distribution                   | 2014 | NGO/UN<br>agencies | Centre-<br>based | Community/<br>markets | NGO/UN<br>Agency staff |
| UNICEF,<br>2016 (E) | Non-<br>research | Central<br>African<br>Republic | All ages                                               | IDPs                      | Dispersed          | Household water<br>treatment, Hygiene<br>promotion | 2013 | NGO/UN<br>agencies | Outreach         | Camps                 | NGO/UN<br>Agency staff |

|               |              |                                |                         |                |                 |                                                                                                |      |                                    |              |                                      |                                 |
|---------------|--------------|--------------------------------|-------------------------|----------------|-----------------|------------------------------------------------------------------------------------------------|------|------------------------------------|--------------|--------------------------------------|---------------------------------|
| Crook, 2018   | Non-research | Somalia                        | All ages                | Host, IDPs     | Camp, Dispersed | Household water treatment, Provision of clean water, Latrine provision                         | 2016 | NGO/UN agencies                    | Outreach     | Community/markets, Home              | NGO/UN Agency staff             |
| Berbari, 2014 | Non-research | Lebanon                        | Children 0-59mo, PLW    | Host, Refugees | Camp, Dispersed | Hygiene promotion                                                                              | 2012 | Healthcare system, NGO/UN agencies | Centre-based | Clinics                              | Doctors, Nurses, Social workers |
| Seguin, 2014  | Non-research | Lebanon                        | Adolescents ≥15yrs, PLW | Refugees       | Camp            | Soap/hygiene kit distribution                                                                  | 2014 | NGO/UN agencies                    | Outreach     | Health posts, ACF tents(Safe Havens) | NGO/UN Agency staff             |
| Tchamba, 2017 | Non-research | Congo (Democratic Republic of) | Children 1-59mo, PLW    | IDPs           | NR              | Latrine provision, Provision of clean water, Provision of water storage kits to health centres | 2013 | Healthcare system, NGO/UN agencies | Centre-based | Clinics                              | NGO/UN Agency staff             |



|                                      |              |                                                                                                   |                  |                     |                  |                                                                                                                                                 |      |                                      |              |                                                                |                                                                                      |
|--------------------------------------|--------------|---------------------------------------------------------------------------------------------------|------------------|---------------------|------------------|-------------------------------------------------------------------------------------------------------------------------------------------------|------|--------------------------------------|--------------|----------------------------------------------------------------|--------------------------------------------------------------------------------------|
| Desie, 2017                          | Non-research | Somalia                                                                                           | All ages         | IDPs, Not displaced | Camp, Dispersed  | Hygiene promotion, Soap/hygiene kit distribution                                                                                                | 2017 | Healthcare system, NGO/UN agencies   | Outreach     | Mobile clinics                                                 | Health workers, Paramedics                                                           |
| Farah, 2014                          | Non-research | Somalia                                                                                           | Children 5-19yrs | Not displaced       | Dispersed        | Latrine provision, Provision of clean water                                                                                                     | 2013 | Education, NGO/UN agencies, Research | Centre-based | Schools                                                        | NGO/UN Agency staff, Researchers, Formal Education Network for Private Schools staff |
| Solidarités International , 2018 (A) | Non-research | Lebanon                                                                                           | All ages         | Refugees            | NR               | Hygiene promotion                                                                                                                               | 2016 | NGO/UN agencies                      | Outreach     | Community/ market, home                                        | NGO/UN Agency staff                                                                  |
| Solidarités International , 2013     | Non-research | Thailand, Myanmar, Afghanistan, Lebanon, South Sudan, Central African Republic, Congo (Democratic | All ages         | IDPs, refugees      | Camps, dispersed | Latrine provision, Household water treatment, Soap/hygiene kit distribution, Provision of clean water, Water vouchers(other), Hygiene promotion | NR   | NGO/UN agencies                      | Mixed        | Health centres, Schools, Community/ market, home, water points | NGO/UN Agency staff, refugees and local Thai people                                  |

|                                  |              |                                                                                                                                                      |          |                                          |                  |                                                                                                                                                        |    |                 |       |                                                                                                                             |                                                 |
|----------------------------------|--------------|------------------------------------------------------------------------------------------------------------------------------------------------------|----------|------------------------------------------|------------------|--------------------------------------------------------------------------------------------------------------------------------------------------------|----|-----------------|-------|-----------------------------------------------------------------------------------------------------------------------------|-------------------------------------------------|
|                                  |              | Republic of), Somalia, Mali, Mauritania                                                                                                              |          |                                          |                  |                                                                                                                                                        |    |                 |       |                                                                                                                             |                                                 |
| Solidarités International , 2014 | Non-research | Mali, Mauritania, Central African Republic, Cameroon, Chad, South Sudan, Congo (Democratic Republic of), Somalia, Lebanon, Burma (Myanmar), Thailand | All ages | IDPs, host, refugees, returning refugees | Camps, dispersed | Provision of clean water, Latrine provision, Hygiene promotion, Source-based water treatment, Soap/hygiene kit distribution, Household water treatment | NR | NGO/UN agencies | Mixed | Health facilities, Schools, Community/markets, Mobile cinemas, water outlets at entry/exit of POC sites, home, water points | NGO/UN Agency staff, waste management committee |
| Solidarités International , 2015 | Non-research | Lebanon, Cameroon, Niger, Congo (Democratic Republic of), South Sudan, Somalia, Burma (Myanmar), Thailand, Afghanistan                               | All ages | IDPs, host, refugees, returning refugees | Camps, dispersed | Provision of clean water, Latrine provision, Hygiene promotion, Disinfected household toilets (other)                                                  | NR | NGO/UN agencies | Mixed | Hospitals, Schools, Community/markets, home, Water points,                                                                  | NGO/UN Agency staff                             |

|                                  |              |                                                                                                                                              |          |                                 |                  |                                                                                                                                             |    |                 |       |                                                                                                     |                     |
|----------------------------------|--------------|----------------------------------------------------------------------------------------------------------------------------------------------|----------|---------------------------------|------------------|---------------------------------------------------------------------------------------------------------------------------------------------|----|-----------------|-------|-----------------------------------------------------------------------------------------------------|---------------------|
| Solidarités International , 2016 | Non-research | Nigeria, Syria, Mali, Central African Republic, Cameroon, Congo (Democratic Republic of), South Sudan, Bangladesh, Burma (Myanmar), Thailand | All ages | IDPs, host, refugees, returnees | Camps, dispersed | Latrine provision, Provision of clean water, Source-based water treatment, Hygiene promotion                                                | NR | NGO/UN agencies | Mixed | Hospitals, Health centres, Clinics, Schools, Community/ market, Water treatment plant, Water points | NGO/UN Agency staff |
| Solidarités International , 2017 | Non-research | Syria, Iraq, Mali, Central African Republic, Cameroon, South Sudan, Congo (Democratic Republic of), Bangladesh, Burma (Myanmar), Afghanistan | All ages | IDPs, host, refugees, returnees | Camps, dispersed | Source-based water treatment, Hygiene promotion, Water and sanitation infrastructures (other) , Provision of clean water, Latrine provision | NR | NGO/UN agencies | Mixed | Water treatment plant, health centres, home, water points, community/ markets, schools              | NGO/UN Agency staff |

|                                      |              |                                                                                                                                                                            |          |                                 |                  |                                                                                                          |      |                 |          |                                                                                       |                                       |
|--------------------------------------|--------------|----------------------------------------------------------------------------------------------------------------------------------------------------------------------------|----------|---------------------------------|------------------|----------------------------------------------------------------------------------------------------------|------|-----------------|----------|---------------------------------------------------------------------------------------|---------------------------------------|
| Solidarités International , 2018 (B) | Non-research | Burkina Faso, Syria, Iraq, Yemen, Mali, Central African Republic, Cameroon, Nigeria, South Sudan, Congo (Democratic Republic of), Bangladesh, Burma (Myanmar), Afghanistan | All ages | IDPs, host, refugees, returnees | Camps, dispersed | Provision of clean water, Source-based water treatment, Latrine provision, Soap/hygiene kit distribution | NR   | NGO/UN agencies | Mixed    | Water points, water treatment plant, Health centres, Community/markets, home, schools | NGO/UN Agency staff                   |
| Cardon, 2018                         | Non-research | Congo (Democratic Republic of)                                                                                                                                             | All ages | NR                              | NR               | Hygiene promotion, Latrine provision, Source-based water treatment                                       | 2017 | NGO/UN agencies | Mixed    | Home, Community /markets, Health centres, Schools, Water points                       | NGO/UN Agency staff, Community relays |
| Cavalazzi, 2016                      | Non-research | Thailand                                                                                                                                                                   | All ages | Host, refugees                  | Camps            | Sludge treatment unit construction(other)                                                                | NR   | NGO/UN agencies | Outreach | Sludge treatment sites                                                                | NGO/UN Agency staff                   |
